# Supplementary material
Source: PubMed Central journal article supplement (PMC2928892)
Supplement: supp_95_7_3094__1.pdf [file supp_95_7_3094__1.pdf]

**Approach to the patient with Resistance to Thyroid Hormone and Pregnancy**  
by Roy E. Weiss, Alexandra Dumitrescu and Samuel Refetoff

1. *Women with RTH have miscarriage rates that are:*

- a) the same as unaffected women
- b) twice the rate of unaffected women
- c) 3-4 times the rate of unaffected women
- d) higher than unaffected women due to the frequency of premature labor and pre-eclampsia

2. *Unaffected infants born to RTH mothers have:*

- a) macrosomia and goiter
- b) suppressed serum TSH at birth and low birth weight
- c) high serum TSH at birth and normal birth weight
- d) lower serum TSH in adulthood

3. *The diagnosis of RTH is not consistent with which one of the following:*

- a) suppressed serum reverse T<sub>3</sub> concentration
- b) goiter
- c) tachycardia
- d) suppressed serum TSH

4. *In which of the following cases would it be appropriate to prescribe thyroid hormone lowering therapy for the gravida:*

- a) An RTH mother with an RTH fetus who is homozygous for a missense mutation in the thyroid hormone receptor  $\beta$ .
- b) An RTH mother with history of short stature and seizure disorder with an IQ of 60 and baseline heart rate of 99-110 with a normal fetus.
- c) An unaffected mother with an RTH fetus (father had RTH) without any evidence of a goiter on screening fetal ultrasound
- d) An RTH mother carrying an unaffected fetus who has a free T<sub>4</sub> 20% above the upper limit of normal.

Contact Information (please print):

First Name: \_\_\_\_\_ MI: \_\_\_\_\_ Last Name: \_\_\_\_\_

Address: \_\_\_\_\_

City: \_\_\_\_\_ State: \_\_\_\_\_ Zip: \_\_\_\_\_ Country: \_\_\_\_\_

Degree(s): \_\_\_\_\_ Endocrine Society Member or Subscriber ID # (if available): \_\_\_\_\_

Email: \_\_\_\_\_

Which of the following best describes your primary area of practice?

- Endocrinology, Diabetes & Metabolism  
 Pediatric Endocrinology

- Reproductive Endocrinology  
 Other: \_\_\_\_\_

Post-Activity Test Answers:

- |            |    |    |    |            |    |    |    |            |    |    |    |            |    |    |    |
|------------|----|----|----|------------|----|----|----|------------|----|----|----|------------|----|----|----|
| Question 1 |    |    |    | Question 2 |    |    |    | Question 3 |    |    |    | Question 4 |    |    |    |
| a)         | b) | c) | d) |

*The Endocrine Society strives to offer high quality CME programs that are educationally balanced and free from commercial bias. Please help us maintain this important standard by providing the requested information in the activity assessment below:*

|                                                                        | Yes                      | No                       |
|------------------------------------------------------------------------|--------------------------|--------------------------|
| 1. Did the program meet the stated learning objectives?                | <input type="checkbox"/> | <input type="checkbox"/> |
| 2. The content was clinically/scientifically sound and evidence-based. | <input type="checkbox"/> | <input type="checkbox"/> |
| 3. The program was free of commercial bias or influence.               | <input type="checkbox"/> | <input type="checkbox"/> |

If you answered "NO" to question 3, please explain:

|                                         | Excellent                | Above average            | Average                  | Below average            | Poor                     |
|-----------------------------------------|--------------------------|--------------------------|--------------------------|--------------------------|--------------------------|
| 4. Format and organization of activity: | <input type="checkbox"/> |

|                                                                                                   | Definitely               | Very likely              | Possibly                 | Unlikely                 | Not at all               | Not applicable           |
|---------------------------------------------------------------------------------------------------|--------------------------|--------------------------|--------------------------|--------------------------|--------------------------|--------------------------|
| 5. Will the information you received in this activity help you to improve your clinical practice? | <input type="checkbox"/> |

If you answered "DEFINITELY" or "VERY LIKELY" to question 5, please explain:

Answers: 1. c) 2. b)  
3. a) 4. d)

| Definitely | Very likely | Possibly | Unlikely | Not at all | Not applicable |
|------------|-------------|----------|----------|------------|----------------|
|------------|-------------|----------|----------|------------|----------------|

6. Will your patients benefit from your participation in this activity?

|                          |                          |                          |                          |                          |                          |
|--------------------------|--------------------------|--------------------------|--------------------------|--------------------------|--------------------------|
| <input type="checkbox"/> |
|--------------------------|--------------------------|--------------------------|--------------------------|--------------------------|--------------------------|

If you answered "DEFINITELY" or "VERY LIKELY" to question 6, please explain:

| Extremely relevant | Very relevant | Somewhat relevant | Not very relevant | Not at all relevant | Not applicable |
|--------------------|---------------|-------------------|-------------------|---------------------|----------------|
|--------------------|---------------|-------------------|-------------------|---------------------|----------------|

7. Please rate the overall relevance of the topics covered to your clinical practice:

|                          |                          |                          |                          |                          |                          |
|--------------------------|--------------------------|--------------------------|--------------------------|--------------------------|--------------------------|
| <input type="checkbox"/> |
|--------------------------|--------------------------|--------------------------|--------------------------|--------------------------|--------------------------|

8. If applicable, describe any barriers to implementing what you have learned:

If you have identified a barrier, please tell us how we may help you overcome this barrier:

9. Please identify one or more clinical practice needs or challenges or you face that should be addressed in future CME activities:

| Yes | No |
|-----|----|
|-----|----|

10. In order to assess the impact of this educational activity on your clinical practice, The Endocrine Society would like to receive your feedback in a follow-up survey, to be sent 2-3 months following the live program. Please check "YES" if you would like to participate in this survey.

|                          |                          |
|--------------------------|--------------------------|
| <input type="checkbox"/> | <input type="checkbox"/> |
|--------------------------|--------------------------|

*Your comments are very valuable in planning future CME activities, please leave any additional comments in the space below:*

Please click the "Submit Form" button in the top-right corner before [printing your CME certificate](#), below.

**THANK YOU FOR YOUR INPUT!**

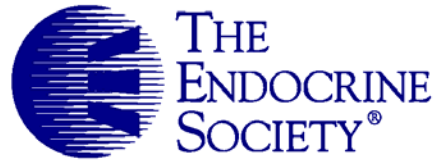

# THE ENDOCRINE SOCIETY

*hereby certifies that*

*has participated in the educational activity entitled*

*and is awarded      AMA PRA Category 1 Credits™.*

*The Endocrine Society is accredited by the Accreditation Council for Continuing Medical Education to provide continuing medical education for physicians. The Endocrine Society has received Accreditation with Commendation. The Endocrine Society designates this educational activity for a maximum of      AMA PRA Category 1 Credit™. Physicians should only claim credit commensurate with the extent of their participation in the activity.*

Certificate Printed:  
Activity & Expiration Dates:

  
Wanda Johnson, CMP, CAE  
Senior Director, Meetings & Education  
The Endocrine Society
